# Supplementary material for: Geochemistry and Geochronology (U-Pb and Lu-Hf) of the Soarinho Alkaline Massif (Brazil): Implications on Mantle versus Crustal Signature of Syenitic Magma
Source: MDPI journal article supplement (doi:10.3390/min13070904), 2023-07-03
Supplement: s1 [file s1]

# Supplementary Material SE

**Table 1: Data of 18 in-situ zircon Lu-Hf isotope analyses from quartz syenite.**

| spot | 176Yb/177Hf ±2s | a  | 176Lu/177Hf ±2s | b | 178Hf/177Hf | 180Hf/177Hf | SigHf | 176Hf/177Hf ±2s | c  | 176Hf/177Hf(t) | eHf(t)    | ±2s     | d   | Avg MORBTDM2 | fTDM2 | g  | age | ±2s | e |
|------|-----------------|----|-----------------|---|-------------|-------------|-------|-----------------|----|----------------|-----------|---------|-----|--------------|-------|----|-----|-----|---|
| 54   | 0,0568          | 46 | 0,00119         | 7 | 1,46633     | 1,88692     | 9     | 0,282475        | 26 | 0,282473736    | -9,721    | 0,94177 | 1,3 | 1,6          | 1,3   | 58 | 2   |     |   |
| 55   | 0,0419          | 34 | 0,00092         | 6 | 1,46632     | 1,88696     | 11    | 0,282489        | 25 | 0,282487538    | -9,23288  | 0,89168 | 1,3 | 1,5          | 1,3   | 58 | 2   |     |   |
| 56   | 0,0296          | 24 | 0,00066         | 4 | 1,46635     | 1,88689     | 8     | 0,282512        | 29 | 0,282511482    | -8,38606  | 0,85818 | 1,3 | 1,5          | 1,2   | 58 | 2   |     |   |
| 57   | 0,0282          | 23 | 0,00063         | 4 | 1,46626     | 1,88688     | 9     | 0,282508        | 29 | 0,282506907    | -8,54785  | 0,85537 | 1,3 | 1,5          | 1,2   | 58 | 2   |     |   |
| 58   | 0,0396          | 35 | 0,00088         | 6 | 1,46628     | 1,887       | 10    | 0,282482        | 37 | 0,282481361    | -9,45133  | 0,89674 | 1,3 | 1,6          | 1,3   | 58 | 2   |     |   |
| 59   | 0,0275          | 24 | 0,00061         | 4 | 1,46637     | 1,88686     | 10    | 0,282546        | 29 | 0,282545573    | -7,18033  | 0,85837 | 1,2 | 1,4          | 1,2   | 58 | 2   |     |   |
| 60   | 0,0292          | 24 | 0,00063         | 4 | 1,46632     | 1,88692     | 12    | 0,282546        | 23 | 0,282545441    | -7,18502  | 0,85848 | 1,2 | 1,4          | 1,2   | 58 | 2   |     |   |
| 61   | 0,0446          | 36 | 0,00096         | 6 | 1,46631     | 1,88677     | 9     | 0,282491        | 17 | 0,282489528    | -9,16249  | 0,89958 | 1,3 | 1,5          | 1,3   | 58 | 2   |     |   |
| 62   | 0,0427          | 34 | 0,00091         | 5 | 1,46642     | 1,88692     | 10    | 0,282506        | 17 | 0,282505199    | -8,60825  | 0,89298 | 1,3 | 1,5          | 1,3   | 58 | 2   |     |   |
| 63   | 0,0272          | 22 | 0,00057         | 3 | 1,46624     | 1,88696     | 10    | 0,282505        | 15 | 0,282504512    | -8,63254  | 0,85291 | 1,3 | 1,5          | 1,3   | 58 | 2   |     |   |
| 64   | 0,0267          | 22 | 0,00058         | 3 | 1,4662      | 1,88685     | 11    | 0,282535        | 17 | 0,282534826    | -7,56044  | 0,85275 | 1,2 | 1,5          | 1,2   | 58 | 2   |     |   |
| 65   | 0,0289          | 23 | 0,00061         | 4 | 1,46619     | 1,88689     | 11    | 0,282528        | 15 | 0,282526999    | -7,83726  | 0,85665 | 1,2 | 1,5          | 1,2   | 58 | 2   |     |   |
| 66   | 0,0554          | 47 | 0,00116         | 7 | 1,46622     | 1,88691     | 11    | 0,282458        | 16 | 0,28245676     | -10,32141 | 0,94797 | 1,4 | 1,6          | 1,3   | 58 | 2   |     |   |
| 67   | 0,0266          | 21 | 0,00059         | 4 | 1,46623     | 1,88688     | 10    | 0,282545        | 18 | 0,282543944    | -7,23797  | 0,85199 | 1,2 | 1,4          | 1,2   | 58 | 2   |     |   |
| 68   | 0,0386          | 31 | 0,00079         | 5 | 1,46639     | 1,88687     | 11    | 0,282515        | 21 | 0,282513938    | -8,29919  | 0,8812  | 1,2 | 1,5          | 1,2   | 58 | 2   |     |   |
| 69   | 0,0316          | 25 | 0,00067         | 4 | 1,4663      | 1,88698     | 10    | 0,282508        | 19 | 0,282506948    | -8,54638  | 0,86289 | 1,3 | 1,5          | 1,2   | 58 | 2   |     |   |
| 70   | 0,0428          | 35 | 0,00097         | 6 | 1,46636     | 1,887       | 8     | 0,282499        | 26 | 0,2824983      | -8,85227  | 0,89494 | 1,3 | 1,5          | 1,3   | 58 | 2   |     |   |
| 71   | 0,0209          | 17 | 0,00047         | 3 | 1,46642     | 1,88685     | 11    | 0,282551        | 25 | 0,282550346    | -7,01155  | 0,8426  | 1,2 | 1,4          | 1,2   | 58 | 2   |     |   |

**Table 2: U-Pb analytical data of the monzonite (SOA-02A). The (\*) indicates spots used in the Concordia.**

| spot | 176Yb/177Hf ±2s | a  | 176Lu/177Hf ±2s | b  | 178Hf/177Hf | 180Hf/177Hf | SigHf | 176Hf/177Hf ±2s | c  | 176Hf/177Hf(t) | eHf(t)    | ±2s     | d   | Avg MORBTDM2 | fTDM2 | g  | age | ±2s | e |
|------|-----------------|----|-----------------|----|-------------|-------------|-------|-----------------|----|----------------|-----------|---------|-----|--------------|-------|----|-----|-----|---|
| 81   | 0,0627          | 52 | 0,00135         | 9  | 1,46622     | 1,88695     | 13    | 0,28251         | 27 | 0,282508903    | -8,43287  | 0,97371 | 1,3 | 1,5          | 1,2   | 60 | 2   |     |   |
| 82   | 0,0553          | 67 | 0,00117         | 12 | 1,46623     | 1,88702     | 14    | 0,282484        | 25 | 0,282482575    | -9,36404  | 1,06035 | 1,3 | 1,6          | 1,3   | 60 | 2   |     |   |
| 83   | 0,0372          | 31 | 0,00081         | 5  | 1,46617     | 1,887       | 11    | 0,282542        | 25 | 0,282540965    | -7,29894  | 0,88119 | 1,2 | 1,4          | 1,2   | 60 | 2   |     |   |
| 84   | 0,0445          | 36 | 0,00096         | 6  | 1,4659      | 1,88698     | 14    | 0,282515        | 24 | 0,282513922    | -8,25537  | 0,89859 | 1,2 | 1,5          | 1,2   | 60 | 2   |     |   |
| 85   | 0,0518          | 42 | 0,0011          | 7  | 1,46616     | 1,88684     | 11    | 0,282475        | 25 | 0,282474056    | -9,66531  | 0,92465 | 1,3 | 1,6          | 1,3   | 60 | 2   |     |   |
| 86   | 0,0266          | 21 | 0,00058         | 4  | 1,46614     | 1,88696     | 13    | 0,282547        | 22 | 0,282546827    | -7,0916   | 0,85162 | 1,2 | 1,4          | 1,2   | 60 | 2   |     |   |
| 87   | 0,0617          | 50 | 0,00132         | 8  | 1,46607     | 1,8868      | 10    | 0,282497        | 27 | 0,282495141    | -8,91958  | 0,96451 | 1,3 | 1,5          | 1,3   | 60 | 2   |     |   |
| 88   | 0,0235          | 19 | 0,00053         | 3  | 1,46615     | 1,88687     | 10    | 0,282569        | 23 | 0,28256878     | -6,31518  | 0,84647 | 1,1 | 1,4          | 1,1   | 60 | 2   |     |   |
| 89   | 0,0711          | 58 | 0,00152         | 9  | 1,46624     | 1,88687     | 9     | 0,282476        | 28 | 0,282474578    | -9,64684  | 1,00623 | 1,3 | 1,6          | 1,3   | 60 | 2   |     |   |
| 91   | 0,0421          | 34 | 0,00104         | 6  | 1,46624     | 1,88697     | 11    | 0,282532        | 23 | 0,282530392    | -7,67285  | 0,89112 | 1,2 | 1,5          | 1,2   | 60 | 2   |     |   |
| 92   | 0,0682          | 60 | 0,00153         | 11 | 1,4662      | 1,88696     | 15    | 0,28246         | 16 | 0,282458739    | -10,20704 | 1,01765 | 1,4 | 1,6          | 1,3   | 60 | 2   |     |   |
| 93   | 0,038           | 31 | 0,00086         | 5  | 1,4662      | 1,88689     | 14    | 0,282509        | 23 | 0,282508393    | -8,4509   | 0,87917 | 1,3 | 1,5          | 1,2   | 60 | 2   |     |   |
| 94   | 0,0435          | 35 | 0,00098         | 6  | 1,46632     | 1,88687     | 11    | 0,282509        | 19 | 0,282508336    | -8,45291  | 0,89559 | 1,3 | 1,5          | 1,2   | 60 | 2   |     |   |
| 95   | 0,0608          | 49 | 0,00134         | 8  | 1,46622     | 1,88687     | 12    | 0,282479        | 24 | 0,282477237    | -9,5528   | 0,95803 | 1,3 | 1,6          | 1,3   | 60 | 2   |     |   |
| 96   | 0,0268          | 22 | 0,00061         | 4  | 1,4663      | 1,88695     | 12    | 0,28256         | 19 | 0,282558933    | -6,66346  | 0,85248 | 1,2 | 1,4          | 1,1   | 60 | 2   |     |   |
| 97   | 0,054           | 43 | 0,0012          | 7  | 1,46641     | 1,88668     | 11    | 0,282513        | 23 | 0,282512081    | -8,32048  | 0,93169 | 1,3 | 1,5          | 1,2   | 60 | 2   |     |   |
| 98   | 0,0354          | 29 | 0,00075         | 5  | 1,46638     | 1,88692     | 14    | 0,282545        | 18 | 0,282543708    | -7,2019   | 0,87312 | 1,2 | 1,4          | 1,2   | 60 | 2   |     |   |
| 99   | 0,0423          | 34 | 0,00093         | 6  | 1,46628     | 1,88682     | 13    | 0,282513        | 19 | 0,282511937    | -8,32558  | 0,89141 | 1,3 | 1,5          | 1,2   | 60 | 2   |     |   |

**Table 3: U-Pb analytical data of the alkali feldspar syenite (SOA-05). The (\*) indicates spots used in the Concordia.**

| spot | 176Yb/177Hf ±2s | a   | 176Lu/177Hf ±2s | b  | 178Hf/177Hf | 180Hf/177Hf | SigHf | 176Hf/177Hf ±2s | c    | 176Hf/177Hf(t) | eHf(t)    | ±2s     | d   | Avg | MORB | TDM2 | fTDM2 | g | age | ±2s | e |
|------|-----------------|-----|-----------------|----|-------------|-------------|-------|-----------------|------|----------------|-----------|---------|-----|-----|------|------|-------|---|-----|-----|---|
| 100  | 0,0728          | 59  | 0,00155         | 9  | 1,46638     | 1,88683     | 9     | 0,282564        | 20   | 0,282562716    | -6,57403  | 1,01504 | 1,2 | 1,4 | 1,1  | 58   | 2     |   |     |     |   |
| 101  | 0,1421          | 114 | 0,00283         | 17 | 1,46621     | 1,88677     | 9     | 0,282403        | 23   | 0,282399913    | -12,3319  | 1,40371 | 1,5 | 1,7 | 1,5  | 58   | 2     |   |     |     |   |
| 102  | 0,0664          | 53  | 0,00137         | 8  | 1,46625     | 1,88695     | 10    | 0,282555        | 19   | 0,282553287    | -6,9075   | 0,98241 | 1,2 | 1,4 | 1,2  | 58   | 2     |   |     |     |   |
| 103  | 0,0911          | 73  | 0,0018          | 11 | 1,46634     | 1,88682     | 9     | 0,282526        | 26   | 0,282523574    | -7,95839  | 1,10385 | 1,2 | 1,5 | 1,2  | 58   | 2     |   |     |     |   |
| 104  | 0,1227          | 99  | 0,0025          | 15 | 1,46636     | 1,88689     | 8     | 0,282421        | 27   | 0,282418674    | -11,66838 | 1,2854  | 1,4 | 1,7 | 1,4  | 58   | 2     |   |     |     |   |
| 105  | 0,0518          | 42  | 0,0011          | 7  | 1,46643     | 1,88684     | 9     | 0,282586        | 27   | 0,282585266    | -5,77652  | 0,92459 | 1,1 | 1,4 | 1,1  | 58   | 2     |   |     |     |   |
| 106  | 0,0575          | 47  | 0,00122         | 7  | 1,46656     | 1,88684     | 9     | 0,282566        | 22   | 0,28256495     | -6,49504  | 0,94668 | 1,1 | 1,4 | 1,1  | 58   | 2     |   |     |     |   |
| 107  | 0,0908          | 74  | 0,00189         | 11 | 1,46651     | 1,88682     | 8     | 0,282476        | 24   | 0,2824738      | -9,71876  | 1,10462 | 1,3 | 1,6 | 1,3  | 58   | 2     |   |     |     |   |
| 108  | 0,0671          | 57  | 0,00138         | 9  | 1,46652     | 1,88683     | 9     | 0,282559        | 25   | 0,282557713    | -6,751    | 0,99986 | 1,2 | 1,4 | 1,1  | 58   | 2     |   |     |     |   |
| 109  | 0,188           | 151 | 0,00377         | 23 | 1,46652     | 1,88681     | 8     | 0,282247        | 22   | 0,28224306     | -17,87937 | 1,7214  | 1,8 | 2   | 1,8  | 58   | 2     |   |     |     |   |
| 110  | 0,0619          | 51  | 0,0013          | 8  | 1,4666      | 1,88694     | 9     | 0,282585        | 14   | 0,28258365     | -5,83366  | 0,96883 | 1,1 | 1,4 | 1,1  | 58   | 2     |   |     |     |   |
| 111  | 0,0904          | 79  | 0,00183         | 12 | 1,46653     | 1,88682     | 8     | 0,282486        | 1120 | 0,28248392     | -9,36083  | 1,1424  | 1,3 | 1,6 | 1,3  | 58   | 2     |   |     |     |   |
| 112  | 0,0854          | 69  | 0,0017          | 10 | 1,46664     | 1,88669     | 9     | 0,28252         | 21   | 0,282518586    | -8,13478  | 1,07327 | 1,2 | 1,5 | 1,2  | 58   | 2     |   |     |     |   |
| 113  | 0,0544          | 44  | 0,00116         | 7  | 1,46665     | 1,8869      | 8     | 0,2826          | 16   | 0,282598905    | -5,29414  | 0,93386 | 1,1 | 1,3 | 1,1  | 58   | 2     |   |     |     |   |
| 114  | 0,0763          | 61  | 0,00158         | 10 | 1,46665     | 1,88677     | 9     | 0,282575        | 14   | 0,282573626    | -6,18819  | 1,02757 | 1,1 | 1,4 | 1,1  | 58   | 2     |   |     |     |   |
| 115  | 0,0712          | 57  | 0,00143         | 9  | 1,46664     | 1,88677     | 10    | 0,282586        | 18   | 0,282583984    | -5,82185  | 1,00353 | 1,1 | 1,4 | 1,1  | 58   | 2     |   |     |     |   |
| 116  | 0,06            | 48  | 0,00121         | 7  | 1,46654     | 1,88692     | 9     | 0,282583        | 20   | 0,282581411    | -5,91285  | 0,95525 | 1,1 | 1,4 | 1,1  | 58   | 2     |   |     |     |   |

Table 4: U-Pb analytical data of the nepheline syenite. The (\*) indicates spots used in the Concordia.

| spot | 176Yb/177Hf ±2s | a   | 176Lu/177Hf ±2s | b  | 178Hf/177Hf | 180Hf/177Hf | SigHf | 176Hf/177Hf ±2s | c  | 176Hf/177Hf(t) | eHf(t)    | ±2s     | d   | Avg MORBTDM2 | fTDM2 | g  | age | ±2s | e |
|------|-----------------|-----|-----------------|----|-------------|-------------|-------|-----------------|----|----------------|-----------|---------|-----|--------------|-------|----|-----|-----|---|
| 146  | 0,1384          | 119 | 0,00339         | 22 | 1,46662     | 1,88683     | 7     | 0,282365        | 18 | 0,282360449    | -13,5502  | 1,44319 | 1,5 | 1,8          | 1,5   | 65 | 0   |     |   |
| 147  | 0,1854          | 149 | 0,00443         | 27 | 1,46666     | 1,88686     | 8     | 0,282272        | 18 | 0,282266193    | -16,90598 | 1,70235 | 1,7 | 2            | 1,7   | 65 | 0   |     |   |
| 148  | 0,0513          | 41  | 0,00126         | 8  | 1,46667     | 1,88693     | 7     | 0,28256         | 19 | 0,282558141    | -6,55827  | 0,92171 | 1,2 | 1,4          | 1,1   | 65 | 0   |     |   |
| 149  | 0,0538          | 51  | 0,00134         | 10 | 1,46665     | 1,88668     | 7     | 0,282578        | 22 | 0,282575894    | -5,9526   | 0,97174 | 1,1 | 1,4          | 1,1   | 65 | 0   |     |   |
| 150  | 0,1753          | 141 | 0,00422         | 25 | 1,46664     | 1,88663     | 8     | 0,282294        | 16 | 0,282289077    | -16,03009 | 1,62916 | 1,7 | 1,9          | 1,7   | 65 | 0   |     |   |
| 151  | 0,1356          | 113 | 0,00323         | 20 | 1,4666      | 1,88679     | 8     | 0,282367        | 17 | 0,282362827    | -13,46609 | 1,40026 | 1,5 | 1,8          | 1,5   | 65 | 0   |     |   |
| 152  | 0,1419          | 115 | 0,00356         | 22 | 1,46657     | 1,88662     | 7     | 0,282337        | 17 | 0,282332192    | -14,54958 | 1,40989 | 1,6 | 1,8          | 1,6   | 65 | 0   |     |   |
| 153  | 0,3176          | 255 | 0,00716         | 43 | 1,46666     | 1,88666     | 8     | 0,281848        | 12 | 0,28183932     | -31,98133 | 2,6697  | 2,5 | 2,8          | 2,5   | 65 | 0   |     |   |
| 154  | 0,0732          | 59  | 0,00188         | 12 | 1,46673     | 1,8867      | 8     | 0,282515        | 18 | 0,282513083    | -8,15186  | 1,01585 | 1,2 | 1,5          | 1,2   | 65 | 0   |     |   |
| 155  | 0,1181          | 99  | 0,00294         | 19 | 1,46667     | 1,88675     | 7     | 0,282423        | 18 | 0,282419214    | -11,47181 | 1,28749 | 1,4 | 1,7          | 1,4   | 65 | 0   |     |   |
| 156  | 0,1048          | 89  | 0,00259         | 17 | 1,46674     | 1,88677     | 8     | 0,282452        | 11 | 0,282448419    | -10,41669 | 1,21291 | 1,4 | 1,6          | 1,4   | 65 | 0   |     |   |
| 157  | 0,057           | 47  | 0,00142         | 9  | 1,4667      | 1,88664     | 9     | 0,282565        | 13 | 0,282563368    | -6,39562  | 0,94861 | 1,1 | 1,4          | 1,1   | 65 | 0   |     |   |
| 158  | 0,0625          | 52  | 0,00173         | 11 | 1,46666     | 1,88676     | 7     | 0,282567        | 13 | 0,282564432    | -6,35798  | 0,97586 | 1,1 | 1,4          | 1,1   | 65 | 0   |     |   |
| 159  | 0,1093          | 89  | 0,00264         | 16 | 1,4667      | 1,8868      | 7     | 0,282463        | 26 | 0,282460057    | -10,00508 | 1,21242 | 1,3 | 1,6          | 1,3   | 65 | 0   |     |   |
| 160  | 0,0883          | 99  | 0,00208         | 20 | 1,46672     | 1,88677     | 7     | 0,282496        | 14 | 0,28249395     | -8,85074  | 1,2862  | 1,3 | 1,5          | 1,3   | 65 | 0   |     |   |
| 161  | 0,0803          | 76  | 0,0021          | 14 | 1,46665     | 1,88667     | 6     | 0,282553        | 15 | 0,282550548    | -6,87123  | 1,1185  | 1,2 | 1,4          | 1,2   | 65 | 0   |     |   |
| 162  | 0,0623          | 50  | 0,00159         | 10 | 1,4667      | 1,88683     | 6     | 0,282539        | 18 | 0,282537331    | -7,31647  | 0,96484 | 1,2 | 1,4          | 1,2   | 65 | 0   |     |   |
| 163  | 0,102           | 87  | 0,00243         | 16 | 1,46667     | 1,8867      | 7     | 0,282442        | 16 | 0,282438908    | -10,77526 | 1,19688 | 1,4 | 1,6          | 1,4   | 65 | 0   |     |   |
| 164  | 0,0346          | 31  | 0,00085         | 6  | 1,46662     | 1,88663     | 7     | 0,282602        | 21 | 0,282601095    | -5,06129  | 0,87999 | 1,1 | 1,3          | 1,1   | 65 | 0   |     |   |
| 165  | 0,0634          | 51  | 0,00156         | 9  | 1,46675     | 1,88674     | 7     | 0,282515        | 17 | 0,282513438    | -8,1615   | 0,96917 | 1,2 | 1,5          | 1,2   | 65 | 0   |     |   |
