# Supplementary material for: Geochemistry and Geochronology (U-Pb and Lu-Hf) of the Soarinho Alkaline Massif (Brazil): Implications on Mantle versus Crustal Signature of Syenitic Magma
Source: MDPI journal article supplement (doi:10.3390/min13070904), 2023-07-03
Supplement: s1 [file s1]

## Supplementary Material SB

### GJ1 data

| GJ1 - spot | $^{176}\text{Yb}/^{177}\text{Hf}$ a | $\pm 2s$ | $^{176}\text{Lu}/^{177}\text{Hf}$ a | $\pm 2s$ | $^{178}\text{Hf}/^{177}\text{Hf}$ | $\pm 2s$ | SigHf b (V) | $^{176}\text{Hf}/^{177}\text{Hf}$ | $\pm 2s$ c | $^{176}\text{Hf}/^{177}\text{Hf}(t)$ d | eHf(t) d | $\pm 2s$ c | age         |
|------------|-------------------------------------|----------|-------------------------------------|----------|-----------------------------------|----------|-------------|-----------------------------------|------------|----------------------------------------|----------|------------|-------------|
| 11         | 0,011774138                         | 10       | 0,00027515                          | 2        | 1,466447403                       |          | 11          | 0,281996768                       | 26         | 0,281993658                            | -15      | 1          | 602 $\pm$ 1 |
| 12         | 0,011749949                         | 9        | 0,000274383                         | 2        | 1,466353491                       |          | 11          | 0,281994442                       | 19         | 0,281991341                            | -15      | 1          | 602 $\pm$ 1 |
| 13         | 0,011754687                         | 9        | 0,000273049                         | 2        | 1,466398332                       |          | 11          | 0,281995493                       | 17         | 0,281992407                            | -15      | 1          | 602 $\pm$ 1 |
| 14         | 0,011768027                         | 9        | 0,000273554                         | 2        | 1,466420501                       |          | 11          | 0,281998172                       | 18         | 0,28199508                             | -15      | 1          | 602 $\pm$ 1 |
| 51         | 0,011623613                         | 9        | 0,000272305                         | 2        | 1,466011549                       |          | 11          | 0,281999397                       | 26         | 0,281996319                            | -14      | 1          | 602 $\pm$ 1 |
| 78         | 0,011542247                         | 9        | 0,000271905                         | 2        | 1,466055952                       |          | 11          | 0,281994033                       | 30         | 0,281990959                            | -15      | 1          | 602 $\pm$ 1 |
| 80         | 0,01138167                          | 9        | 0,000271003                         | 2        | 1,466161807                       |          | 11          | 0,281992194                       | 18         | 0,281989131                            | -15      | 1          | 602 $\pm$ 1 |
| 124        | 0,011115186                         | 9        | 0,000270473                         | 2        | 1,466500197                       |          | 10          | 0,2819892                         | 17         | 0,281986143                            | -15      | 1          | 602 $\pm$ 1 |
| 125        | 0,01106148                          | 9        | 0,000269598                         | 2        | 1,466470926                       |          | 10          | 0,282004712                       | 16         | 0,282001665                            | -14      | 1          | 602 $\pm$ 1 |
| 172        | 0,011013547                         | 9        | 0,000266887                         | 2        | 1,466881036                       |          | 9           | 0,28198857                        | 16         | 0,281985554                            | -15      | 1          | 602 $\pm$ 1 |
| 223        | 0,01150191                          | 9        | 0,000267458                         | 2        | 1,46673475                        |          | 10          | 0,281996015                       | 18         | 0,281992992                            | -15      | 1          | 602 $\pm$ 1 |
| 221        | 0,011205774                         | 9        | 0,000267507                         | 2        | 1,466683259                       |          | 10          | 0,281963195                       | 16         | 0,281960172                            | -16      | 1          | 602 $\pm$ 1 |
| 52         | 0,011523742                         | 10       | 0,000273808                         | 2        | 1,46595664                        |          | 11          | 0,281974915                       | 20         | 0,28197182                             | -15      | 1          | 602 $\pm$ 1 |
| 173        | 0,01095398                          | 9        | 0,000267169                         | 2        | 1,466769861                       |          | 9           | 0,281967836                       | 15         | 0,281964816                            | -16      | 1          | 602 $\pm$ 1 |
| 222        | 0,011361843                         | 9        | 0,000270161                         | 2        | 1,466724921                       |          | 10          | 0,281981124                       | 15         | 0,28197807                             | -15      | 1          | 602 $\pm$ 1 |
| 53         | 0,011467068                         | 10       | 0,000273722                         | 2        | 1,466083847                       |          | 11          | 0,281984228                       | 29         | 0,281981134                            | -15      | 1          | 602 $\pm$ 1 |
