# Supplementary material for: Geochemistry and Geochronology (U-Pb and Lu-Hf) of the Soarinho Alkaline Massif (Brazil): Implications on Mantle versus Crustal Signature of Syenitic Magma
Source: MDPI journal article supplement (doi:10.3390/min13070904), 2023-07-03
Supplement: s1 [file s1]

## Supplementary Material SC

### Plesovice data

| Plesovice - spot | <sup>176</sup> Yb/ <sup>177</sup> Hf a | ±2s | <sup>176</sup> Lu/ <sup>177</sup> Hf a | ±2s | <sup>178</sup> Hf/ <sup>177</sup> Hf | ±2s | SigHf b (V) | <sup>176</sup> Hf/ <sup>177</sup> Hf | ±2s c | <sup>176</sup> Hf/ <sup>177</sup> Hf(t)d | eHf(t) d | ±2s c | age     |
|------------------|----------------------------------------|-----|----------------------------------------|-----|--------------------------------------|-----|-------------|--------------------------------------|-------|------------------------------------------|----------|-------|---------|
| 9                | 0,010284188                            | 9   | 0,000157413                            | 1   | 1,466262903                          |     | 17          | 0,28246482                           | 20    | 0,282463826                              | -4       | 1     | 337 ± 1 |
| 10               | 0,009385356                            | 8   | 0,000142235                            | 1   | 1,466275362                          |     | 16          | 0,282470808                          | 20    | 0,282469911                              | -4       | 1     | 337 ± 1 |
| 49               | 0,011993666                            | 10  | 0,000182808                            | 1   | 1,465860142                          |     | 16          | 0,282470504                          | 37    | 0,28246935                               | -4       | 1     | 337 ± 1 |
| 50               | 0,006531667                            | 5   | 9,95202E-05                            | 1   | 1,465918107                          |     | 17          | 0,282480211                          | 32    | 0,282479583                              | -3       | 1     | 337 ± 1 |
| 75               | 0,012208149                            | 10  | 0,000188704                            | 1   | 1,465810015                          |     | 16          | 0,28246421                           | 22    | 0,282463019                              | -4       | 1     | 337 ± 1 |
| 76               | 0,004919652                            | 4   | 7,39066E-05                            | 0   | 1,466030173                          |     | 16          | 0,282470464                          | 25    | 0,282469997                              | -4       | 1     | 337 ± 1 |
| 77               | 0,006492423                            | 6   | 9,97477E-05                            | 1   | 1,465999817                          |     | 17          | 0,282474415                          | 25    | 0,282473786                              | -4       | 1     | 337 ± 1 |
| 121              | 0,014581108                            | 12  | 0,000222324                            | 1   | 1,466437945                          |     | 16          | 0,282465711                          | 17    | 0,282464308                              | -4       | 1     | 337 ± 1 |
| 169              | 0,007177392                            | 6   | 0,000109755                            | 1   | 1,466717123                          |     | 15          | 0,282465698                          | 15    | 0,282465005                              | -4       | 1     | 337 ± 1 |
| 170              | 0,007990795                            | 7   | 0,000122274                            | 1   | 1,466730322                          |     | 16          | 0,282466147                          | 17    | 0,282465375                              | -4       | 1     | 337 ± 1 |
| 171              | 0,013114777                            | 11  | 0,00020118                             | 1   | 1,466819258                          |     | 16          | 0,282463886                          | 15    | 0,282462616                              | -4       | 1     | 337 ± 1 |
| 220              | 0,004370009                            | 5   | 6,72365E-05                            | 1   | 1,466783264                          |     | 16          | 0,282472416                          | 16    | 0,282471991                              | -4       | 1     | 337 ± 1 |
| 8                | 0,012745411                            | 10  | 0,000195521                            | 1   | 1,46619164                           |     | 16          | 0,282448697                          | 28    | 0,282447463                              | -4       | 1     | 337 ± 1 |
| 7                | 0,012143122                            | 10  | 0,00018514                             | 1   | 1,466162741                          |     | 16          | 0,282451879                          | 25    | 0,28245071                               | -4       | 1     | 337 ± 1 |
| 48               | 0,010974397                            | 9   | 0,000168753                            | 1   | 1,465854422                          |     | 17          | 0,282449127                          | 31    | 0,282448062                              | -4       | 1     | 337 ± 1 |
| 120              | 0,012331024                            | 10  | 0,000191054                            | 1   | 1,466437841                          |     | 17          | 0,282450226                          | 13    | 0,28244902                               | -4       | 1     | 337 ± 1 |
| 219              | 0,014778053                            | 14  | 0,000224077                            | 2   | 1,466716224                          |     | 15          | 0,28246122                           | 19    | 0,282459805                              | -4       | 1     | 337 ± 1 |
| 6                | 0,011270372                            | 9   | 0,000170793                            | 1   | 1,466158649                          |     | 16          | 0,282460681                          | 24    | 0,282459603                              | -4       | 1     | 337 ± 1 |
