# Supplementary material for: Geochemistry and Geochronology (U-Pb and Lu-Hf) of the Soarinho Alkaline Massif (Brazil): Implications on Mantle versus Crustal Signature of Syenitic Magma
Source: MDPI journal article supplement (doi:10.3390/min13070904), 2023-07-03
Supplement: s1 [file s1]

## Supplementary Material SD

**Table 1. U-Pb analytical data of the quartz syenite (SOA-01A). The (\*) indicates spots used in the Concordia.**

| Plesovice - spot | $^{176}\text{Yb}/^{177}\text{Hf}$ a | $\pm 2s$ | $^{176}\text{Lu}/^{177}\text{Hf}$ a | $\pm 2s$ | $^{178}\text{Hf}/^{177}\text{Hf}$ | $\pm 2s$ | SigHf b (V) | $^{176}\text{Hf}/^{177}\text{Hf}$ | $\pm 2s$ c | $^{176}\text{Hf}/^{177}\text{Hf}(t)$ d | eHf(t) d | $\pm 2s$ c | age         |
|------------------|-------------------------------------|----------|-------------------------------------|----------|-----------------------------------|----------|-------------|-----------------------------------|------------|----------------------------------------|----------|------------|-------------|
| 9                | 0,010284188                         | 9        | 0,000157413                         | 1        | 1,466262903                       |          | 17          | 0,28246482                        | 20         | 0,282463826                            | -4       | 1          | $337 \pm 1$ |
| 10               | 0,009385356                         | 8        | 0,000142235                         | 1        | 1,466275362                       |          | 16          | 0,282470808                       | 20         | 0,282469911                            | -4       | 1          | $337 \pm 1$ |
| 49               | 0,011993666                         | 10       | 0,000182808                         | 1        | 1,465860142                       |          | 16          | 0,282470504                       | 37         | 0,28246935                             | -4       | 1          | $337 \pm 1$ |
| 50               | 0,006531667                         | 5        | 9,95202E-05                         | 1        | 1,465918107                       |          | 17          | 0,282480211                       | 32         | 0,282479583                            | -3       | 1          | $337 \pm 1$ |
| 75               | 0,012208149                         | 10       | 0,000188704                         | 1        | 1,465810015                       |          | 16          | 0,28246421                        | 22         | 0,282463019                            | -4       | 1          | $337 \pm 1$ |
| 76               | 0,004919652                         | 4        | 7,39066E-05                         | 0        | 1,466030173                       |          | 16          | 0,282470464                       | 25         | 0,282469997                            | -4       | 1          | $337 \pm 1$ |
| 77               | 0,006492423                         | 6        | 9,97477E-05                         | 1        | 1,465999817                       |          | 17          | 0,282474415                       | 25         | 0,282473786                            | -4       | 1          | $337 \pm 1$ |
| 121              | 0,014581108                         | 12       | 0,000222324                         | 1        | 1,466437945                       |          | 16          | 0,282465711                       | 17         | 0,282464308                            | -4       | 1          | $337 \pm 1$ |
| 169              | 0,007177392                         | 6        | 0,000109755                         | 1        | 1,466717123                       |          | 15          | 0,282465698                       | 15         | 0,282465005                            | -4       | 1          | $337 \pm 1$ |
| 170              | 0,007990795                         | 7        | 0,000122274                         | 1        | 1,466730322                       |          | 16          | 0,282466147                       | 17         | 0,282465375                            | -4       | 1          | $337 \pm 1$ |
| 171              | 0,013114777                         | 11       | 0,00020118                          | 1        | 1,466819258                       |          | 16          | 0,282463886                       | 15         | 0,282462616                            | -4       | 1          | $337 \pm 1$ |
| 220              | 0,004370009                         | 5        | 6,72365E-05                         | 1        | 1,466783264                       |          | 16          | 0,282472416                       | 16         | 0,282471991                            | -4       | 1          | $337 \pm 1$ |
| 8                | 0,012745411                         | 10       | 0,000195521                         | 1        | 1,46619164                        |          | 16          | 0,282448697                       | 28         | 0,282447463                            | -4       | 1          | $337 \pm 1$ |
| 7                | 0,012143122                         | 10       | 0,00018514                          | 1        | 1,466162741                       |          | 16          | 0,282451879                       | 25         | 0,28245071                             | -4       | 1          | $337 \pm 1$ |
| 48               | 0,010974397                         | 9        | 0,000168753                         | 1        | 1,465854422                       |          | 17          | 0,282449127                       | 31         | 0,282448062                            | -4       | 1          | $337 \pm 1$ |
| 120              | 0,012331024                         | 10       | 0,000191054                         | 1        | 1,466437841                       |          | 17          | 0,282450226                       | 13         | 0,28244902                             | -4       | 1          | $337 \pm 1$ |
| 219              | 0,014778053                         | 14       | 0,000224077                         | 2        | 1,466716224                       |          | 15          | 0,28246122                        | 19         | 0,282459805                            | -4       | 1          | $337 \pm 1$ |
| 6                | 0,011270372                         | 9        | 0,000170793                         | 1        | 1,466158649                       |          | 16          | 0,282460681                       | 24         | 0,282459603                            | -4       | 1          | $337 \pm 1$ |

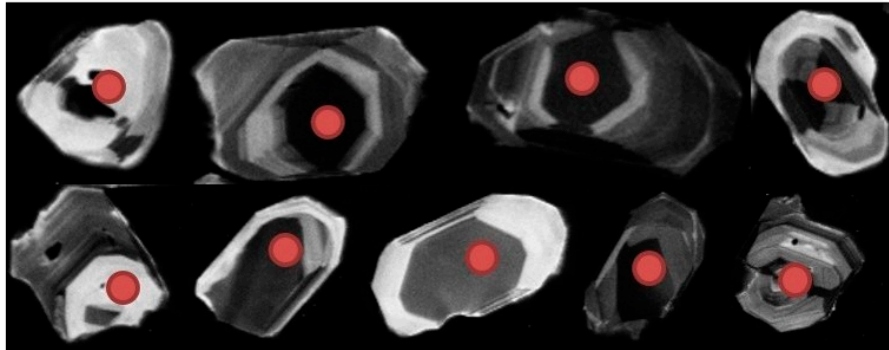

**Figure 1:** Cathodoluminescence images of dated zircons (SOA-01).

Table 2: U-Pb analytical data of the monzonite (SOA-02A). The (\*) indicates spots used in the Concordia.

| Spot | $f^{206}$ | Isotopic ratios |           |          |      |                |            |                |            |      |                 | Ages (Ma)  |                |            |                |            |                 |            | %  |
|------|-----------|-----------------|-----------|----------|------|----------------|------------|----------------|------------|------|-----------------|------------|----------------|------------|----------------|------------|-----------------|------------|----|
|      |           | Pb<br>ppm       | Th<br>ppm | U<br>ppm | Th/U | 207Pb/<br>235U | 1 s<br>[%] | 206Pb/<br>238U | 1 s<br>[%] | Rho  | 207Pb/<br>206Pb | 1 s<br>[%] | 206Pb/<br>238U | 1 s<br>abs | 207Pb/<br>235U | 1 s<br>abs | 207Pb/<br>206Pb | 1 s<br>abs |    |
| 1A   | 0,0047    | 3               | 212       | 225      | 0,94 | 0,063664       | 5,74       | 0,009629       | 5,33       | 0,93 | 0,047952        | 2,12       | 62             | 3          | 63             | 4          | 97              | 2          | 36 |
| 2A   | 0,0039    | 9               | 741       | 780      | 0,95 | 0,062581       | 5,60       | 0,009566       | 5,35       | 0,95 | 0,047449        | 1,66       | 61             | 3          | 62             | 3          | 72              | 1          | 15 |
| 3A*  | 0,0040    | 9               | 853       | 838      | 1,02 | 0,061699       | 5,65       | 0,009473       | 5,43       | 0,96 | 0,047236        | 1,59       | 61             | 3          | 61             | 3          | 61              | 1          | 1  |
| 4A*  | 0,0032    | 13              | 1375      | 1129     | 1,22 | 0,061559       | 5,60       | 0,009453       | 5,42       | 0,97 | 0,047233        | 1,43       | 61             | 3          | 61             | 3          | 61              | 1          | 1  |
| 5A*  | 0,0033    | 11              | 1026      | 905      | 1,13 | 0,061698       | 5,58       | 0,009464       | 5,42       | 0,97 | 0,047282        | 1,32       | 61             | 3          | 61             | 3          | 63              | 1          | 4  |
| 6A*  | 0,0040    | 9               | 841       | 815      | 1,03 | 0,061057       | 5,77       | 0,009381       | 5,57       | 0,97 | 0,047205        | 1,50       | 60             | 3          | 60             | 3          | 60              | 1          | -1 |
| 7A   | 0,0242    | 5               | 504       | 378      | 1,33 | 0,093353       | 7,84       | 0,009726       | 5,35       | 0,68 | 0,069614        | 5,73       | 62             | 3          | 91             | 7          | 917             | 53         | 93 |
| 8A*  | 0,0030    | 3               | 231       | 247      | 0,94 | 0,062902       | 5,97       | 0,009652       | 5,32       | 0,89 | 0,047268        | 2,70       | 62             | 3          | 62             | 4          | 63              | 2          | 1  |
| 9A*  | 0,0044    | 7               | 860       | 529      | 1,62 | 0,061189       | 5,71       | 0,009402       | 5,46       | 0,96 | 0,047203        | 1,67       | 60             | 3          | 60             | 3          | 60              | 1          | -1 |
| 1B*  | 0,0040    | 5               | 594       | 452      | 1,31 | 0,060534       | 5,97       | 0,009301       | 5,81       | 0,97 | 0,047203        | 1,37       | 60             | 3          | 60             | 4          | 60              | 1          | 0  |
| 2B   | 0,1921    | 6               | 269       | 325      | 0,83 | 0,312798       | 13,93      | 0,007597       | 7,77       | 0,56 | 0,298620        | 11,56      | 49             | 4          | 276            | 39         | 3463            | 400        | 99 |
| 3B   | 0,1015    | 10              | 580       | 595      | 0,98 | 0,101529       | 25,29      | 0,009483       | 5,81       | 0,23 | 0,077651        | 24,62      | 61             | 4          | 98             | 25         | 1138            | 280        | 95 |
| 4B*  | 0,0035    | 4               | 363       | 311      | 1,17 | 0,059692       | 6,27       | 0,009181       | 5,91       | 0,94 | 0,047154        | 2,11       | 59             | 3          | 59             | 4          | 57              | 1          | -3 |
| 5B*  | 0,0022    | 18              | 1763      | 1583     | 1,11 | 0,060030       | 6,01       | 0,009227       | 5,83       | 0,97 | 0,047183        | 1,43       | 59             | 3          | 59             | 4          | 59              | 1          | -1 |
| 6B*  | 0,0049    | 7               | 653       | 628      | 1,04 | 0,059149       | 6,23       | 0,009097       | 5,92       | 0,95 | 0,047155        | 1,92       | 58             | 3          | 58             | 4          | 57              | 1          | -2 |
| 7B   | 0,0053    | 5               | 565       | 487      | 1,16 | 0,067829       | 5,89       | 0,010277       | 5,30       | 0,90 | 0,047870        | 2,57       | 66             | 3          | 67             | 4          | 93              | 2          | 29 |
| 8B*  | 0,0043    | 7               | 885       | 553      | 1,60 | 0,060358       | 6,22       | 0,009264       | 5,82       | 0,94 | 0,047256        | 2,20       | 59             | 3          | 60             | 4          | 62              | 1          | 4  |
| 9B*  | 0,0049    | 6               | 363       | 600      | 0,61 | 0,061350       | 6,01       | 0,009424       | 5,75       | 0,96 | 0,047217        | 1,75       | 60             | 3          | 60             | 4          | 60              | 1          | 0  |

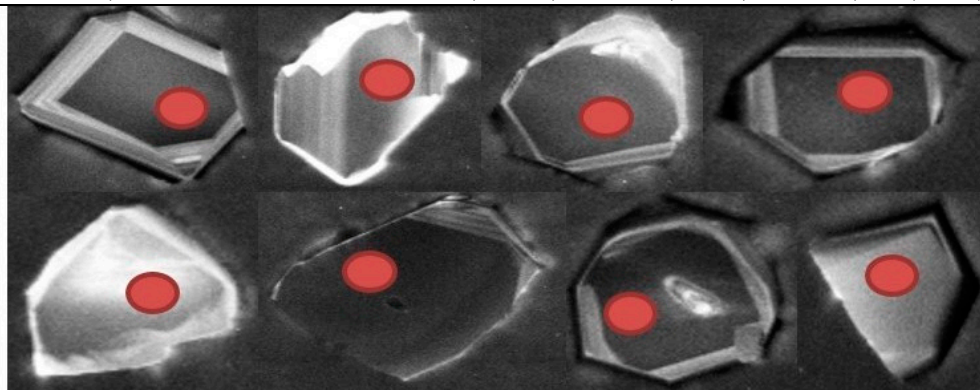

Figure 2: Cathodoluminescence images of dated zircons (SOA-02A).

Table 3: U-Pb analytical data of the alkali feldspar syenite (SOA-05). The (\*) indicates spots used in the Concordia.

| Spot | <i>f</i> 206 | Pb ppm | Th ppm | U ppm | Th/U | Isotopic ratios |      |          |      |      | Ages (Ma) |      |        |     |        |     |        |     | % |
|------|--------------|--------|--------|-------|------|-----------------|------|----------|------|------|-----------|------|--------|-----|--------|-----|--------|-----|---|
|      |              |        |        |       |      | 207Pb/          | 1 s  | 206Pb/   | 1 s  | Rho  | 207Pb/    | 1 s  | 206Pb/ | 1 s | 207Pb/ | 1 s | 207Pb/ | 1 s |   |
|      |              |        |        |       |      | 235U            | [%]  | 238U     | [%]  |      | 206Pb     | [%]  | 238U   | abs | 235U   | abs | 206Pb  | abs |   |
| 1A*  | 0,0020       | 12     | 746    | 1150  | 0,65 | 0,056980        | 8,12 | 0,008761 | 7,98 | 0,98 | 0,047172  | 1,47 | 56     | 4   | 56     | 5   | 58     | 1   | 0 |
| 2A*  | 0,0044       | 8      | 591    | 760   | 0,78 | 0,058718        | 7,91 | 0,009027 | 7,75 | 0,98 | 0,047175  | 1,57 | 58     | 4   | 58     | 5   | 58     | 1   | 0 |
| 3A   | 0,0030       | 24     | 3096   | 1929  | 1,60 | 0,058334        | 7,91 | 0,008920 | 7,84 | 0,99 | 0,047433  | 1,05 | 57     | 4   | 58     | 5   | 71     | 1   | 1 |
| A4*  | 0,0046       | 5      | 404    | 399   | 1,01 | 0,059060        | 8,09 | 0,009069 | 7,73 | 0,96 | 0,047231  | 2,37 | 58     | 5   | 58     | 5   | 61     | 1   | 0 |
| 5A   | 0,0028       | 13     | 1104   | 1141  | 0,97 | 0,057447        | 8,09 | 0,008750 | 8,00 | 0,99 | 0,047617  | 1,17 | 56     | 4   | 57     | 5   | 80     | 1   | 1 |
| 6A*  | 0,0046       | 7      | 503    | 648   | 0,78 | 0,059381        | 7,81 | 0,009126 | 7,68 | 0,98 | 0,047194  | 1,40 | 59     | 4   | 59     | 5   | 59     | 1   | 0 |
| 7A*  | 0,0048       | 4      | 241    | 384   | 0,63 | 0,058930        | 8,00 | 0,009056 | 7,72 | 0,97 | 0,047194  | 2,09 | 58     | 4   | 58     | 5   | 59     | 1   | 0 |
| 8A*  | 0,0046       | 5      | 401    | 405   | 0,99 | 0,058449        | 8,10 | 0,008980 | 7,82 | 0,97 | 0,047206  | 2,09 | 58     | 5   | 58     | 5   | 60     | 1   | 0 |
| 9A*  | 0,0028       | 9      | 953    | 733   | 1,30 | 0,058209        | 8,02 | 0,008951 | 7,85 | 0,98 | 0,047164  | 1,67 | 57     | 5   | 57     | 5   | 58     | 1   | 0 |
| 1B*  | 0,0051       | 5      | 341    | 445   | 0,77 | 0,058638        | 6,07 | 0,009012 | 5,79 | 0,96 | 0,047190  | 1,80 | 58     | 3   | 58     | 4   | 59     | 1   | 0 |
| 2B*  | 0,0042       | 6      | 375    | 537   | 0,70 | 0,059791        | 5,98 | 0,009186 | 5,66 | 0,95 | 0,047207  | 1,93 | 59     | 3   | 59     | 4   | 60     | 1   | 0 |
| 3B   | 0,0058       | 6      | 413    | 567   | 0,73 | 0,064126        | 6,07 | 0,009146 | 5,70 | 0,94 | 0,050854  | 2,08 | 59     | 3   | 63     | 4   | 234    | 5   | 7 |
| 4B*  | 0,0034       | 6      | 399    | 557   | 0,72 | 0,059189        | 5,98 | 0,009090 | 5,72 | 0,96 | 0,047223  | 1,75 | 58     | 3   | 58     | 3   | 61     | 1   | 0 |
| 5B*  | 0,0036       | 8      | 806    | 620   | 1,30 | 0,061121        | 5,79 | 0,009385 | 5,56 | 0,96 | 0,047234  | 1,63 | 60     | 3   | 60     | 3   | 61     | 1   | 0 |
| 6B*  | 0,0028       | 9      | 504    | 828   | 0,61 | 0,059734        | 5,90 | 0,009179 | 5,67 | 0,96 | 0,047199  | 1,63 | 59     | 3   | 59     | 3   | 59     | 1   | 0 |
| 7B*  | 0,0017       | 10     | 937    | 907   | 1,03 | 0,058621        | 5,96 | 0,009007 | 5,76 | 0,97 | 0,047203  | 1,50 | 58     | 3   | 58     | 3   | 60     | 1   | 0 |
| 8B*  | 0,0052       | 5      | 348    | 417   | 0,84 | 0,059519        | 5,95 | 0,009146 | 5,70 | 0,96 | 0,047199  | 1,73 | 59     | 3   | 59     | 3   | 59     | 1   | 0 |
| 9B   | 0,0030       | 9      | 666    | 875   | 0,76 | 0,060200        | 5,76 | 0,009214 | 5,65 | 0,98 | 0,047385  | 1,11 | 59     | 3   | 59     | 3   | 69     | 1   | 0 |

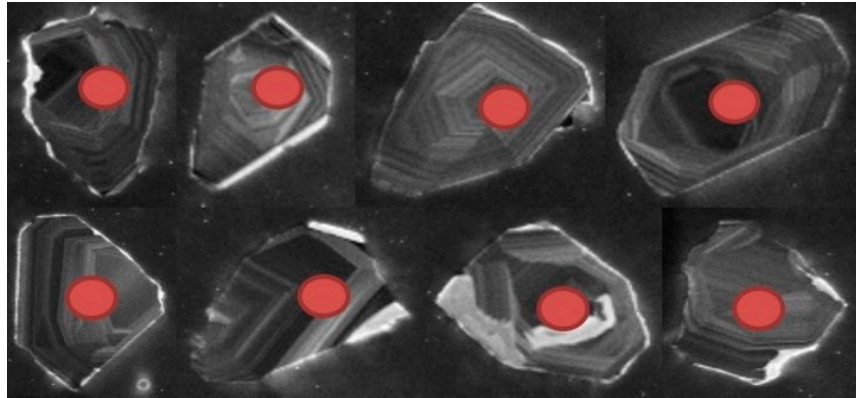

Figure 3: Cathodoluminescence images of dated zircons (SOA-05).

Table 4: U-Pb analytical data of the nepheline syenite. The (\*) indicate spots used in the Concordia.

| Spot | Isotopic ratios |      |      |             |        |            |        |            |        |      | Ages (Ma)   |     |            |    |            |    |         |
|------|-----------------|------|------|-------------|--------|------------|--------|------------|--------|------|-------------|-----|------------|----|------------|----|---------|
|      | f206            | U    | Th/U | 207Pb/206Pb | 2s (%) | 207Pb/235U | 2s (%) | 206Pb/238U | 2s (%) | Rho  | 207Pb/206Pb | 2s  | 206Pb/238U | 2s | 207Pb/235U | 2s | % Disc. |
| 7*   | 0,0000          | 557  | 1,98 | 0,047340    | 1,61   | 0,067038   | 2,24   | 0,010270   | 1,56   | 0,70 | 66          | 38  | 66         | 1  | 66         | 1  | 0       |
| 8    | 0,9813          | 473  | 2,40 | 0,046935    | 4,62   | 0,068213   | 19,28  | 0,010541   | 18,72  | 0,97 | 46          | 110 | 68         | 13 | 67         | 13 | -1      |
| 9    | 0,6045          | 867  | 2,15 | 0,047074    | 2,99   | 0,067375   | 12,13  | 0,010381   | 11,76  | 0,97 | 53          | 71  | 67         | 8  | 66         | 8  | -1      |
| 10   | 0,0000          | 303  | 1,50 | 0,058260    | 1,32   | 0,081456   | 2,06   | 0,010140   | 1,58   | 0,77 | 540         | 29  | 65         | 1  | 80         | 2  | 18      |
| 11*  | 0,0000          | 1731 | 3,96 | 0,047400    | 1,12   | 0,069347   | 1,88   | 0,010611   | 1,51   | 0,80 | 69          | 27  | 68         | 1  | 68         | 1  | 0       |
| 12   | 0,6210          | 1272 | 3,05 | 0,047086    | 2,95   | 0,067393   | 12,43  | 0,010381   | 12,08  | 0,97 | 54          | 70  | 67         | 8  | 66         | 8  | -1      |
| 13   | 0,5739          | 393  | 1,70 | 0,047068    | 2,82   | 0,066653   | 11,64  | 0,010270   | 11,30  | 0,97 | 53          | 67  | 66         | 7  | 66         | 7  | -1      |
| 14*  | 0,0000          | 90   | 1,00 | 0,047350    | 2,98   | 0,066660   | 3,57   | 0,010210   | 1,96   | 0,55 | 67          | 71  | 65         | 1  | 66         | 2  | 0       |
| 15*  | 0,0000          | 402  | 2,02 | 0,047320    | 1,27   | 0,065834   | 2,03   | 0,010090   | 1,59   | 0,78 | 65          | 30  | 65         | 1  | 65         | 1  | 0       |
| 16   | 2,4933          | 318  | 3,46 | 0,046160    | 10,95  | 0,063774   | 51,03  | 0,010020   | 49,84  | 0,98 | 6           | 264 | 64         | 32 | 63         | 32 | -2      |
| 17   | 3,9215          | 232  | 2,49 | 0,045560    | 17,47  | 0,066844   | 75,84  | 0,010641   | 73,80  | 0,97 | -26         | 423 | 68         | 50 | 66         | 49 | -4      |
| 18*  | 0,0000          | 732  | 2,52 | 0,047350    | 1,33   | 0,067248   | 2,05   | 0,010300   | 1,55   | 0,76 | 67          | 32  | 66         | 1  | 66         | 1  | 0       |
| 19   | 4,1214          | 67   | 0,77 | 0,045427    | 18,83  | 0,065332   | 81,35  | 0,010431   | 79,15  | 0,97 | -33         | 457 | 67         | 53 | 64         | 52 | -4      |
| 20   | 0,0000          | 75   | 1,22 | 0,053040    | 2,17   | 0,072694   | 2,83   | 0,009940   | 1,81   | 0,64 | 331         | 49  | 64         | 1  | 71         | 2  | 11      |
| 27*  | 0,0000          | 63   | 0,86 | 0,047330    | 4,20   | 0,064345   | 4,76   | 0,009860   | 2,23   | 0,47 | 66          | 100 | 63         | 1  | 63         | 3  | 0       |
| 28*  | 0,0000          | 244  | 1,18 | 0,047310    | 2,28   | 0,064579   | 3,05   | 0,009900   | 2,02   | 0,66 | 65          | 54  | 64         | 1  | 64         | 2  | 0       |
| 29*  | 0,0000          | 143  | 1,20 | 0,047310    | 2,60   | 0,064253   | 3,30   | 0,009850   | 2,03   | 0,62 | 65          | 62  | 63         | 1  | 63         | 2  | 0       |
| 30   | 0,2665          | 1247 | 3,61 | 0,047214    | 1,81   | 0,069075   | 5,61   | 0,010611   | 5,31   | 0,95 | 60          | 43  | 68         | 4  | 68         | 4  | 0       |
| 32   | 0,5024          | 2238 | 2,55 | 0,047102    | 2,44   | 0,066506   | 10,24  | 0,010240   | 9,95   | 0,97 | 54          | 58  | 66         | 6  | 65         | 6  | 0       |
| 33*  | 0,0000          | 335  | 1,81 | 0,047330    | 1,37   | 0,066958   | 2,08   | 0,010260   | 1,56   | 0,75 | 66          | 33  | 66         | 1  | 66         | 1  | 0       |
| 34*  | 0,0000          | 254  | 1,03 | 0,047320    | 1,78   | 0,066487   | 2,51   | 0,010190   | 1,77   | 0,71 | 65          | 42  | 65         | 1  | 65         | 2  | 0       |
| 35   | 1,0000          | 132  | 1,51 | 0,047414    | 4,90   | 0,066227   | 20,46  | 0,010130   | 19,86  | 0,97 | 70          | 117 | 65         | 13 | 65         | 13 | 0       |
| 36*  | 0,0000          | 168  | 1,63 | 0,047350    | 2,03   | 0,066987   | 2,68   | 0,010260   | 1,76   | 0,65 | 67          | 48  | 66         | 1  | 66         | 2  | 0       |
| 37   | 0,0000          | 113  | 1,09 | 0,050650    | 1,80   | 0,068509   | 2,43   | 0,009810   | 1,63   | 0,67 | 225         | 42  | 63         | 1  | 67         | 2  | 6       |
| 38   | 1,0000          | 164  | 2,44 | 0,047579    | 4,83   | 0,065668   | 20,67  | 0,010010   | 20,10  | 0,97 | 78          | 115 | 64         | 13 | 65         | 13 | 1       |
| 39   | 0,4282          | 577  | 3,09 | 0,047536    | 2,35   | 0,066331   | 8,93   | 0,010120   | 8,62   | 0,96 | 76          | 56  | 65         | 6  | 65         | 6  | 0       |
| 40   | 0,3682          | 295  | 1,50 | 0,047196    | 2,08   | 0,068266   | 7,53   | 0,010491   | 7,23   | 0,96 | 59          | 50  | 67         | 5  | 67         | 5  | 0       |

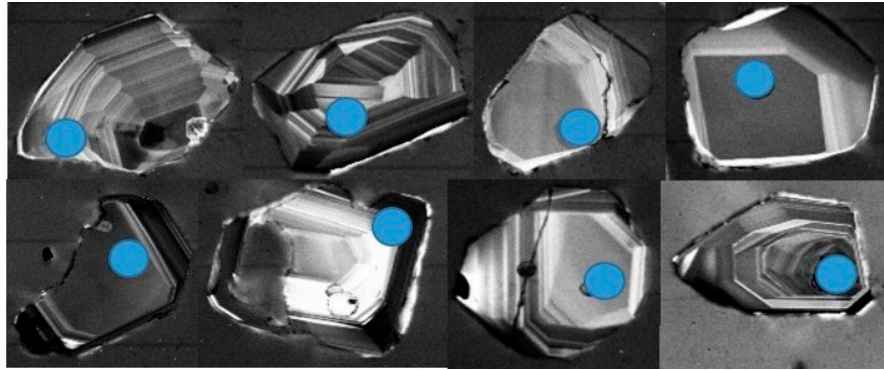

**Figure 4:** Cathodoluminescence images of dated zircons of nefeline syenite.
