# Supplementary material for: Geochemistry and Geochronology (U-Pb and Lu-Hf) of the Soarinho Alkaline Massif (Brazil): Implications on Mantle versus Crustal Signature of Syenitic Magma
Source: MDPI journal article supplement (doi:10.3390/min13070904), 2023-07-03
Supplement: s1 [file s1]

# Supplementary Material SA

## BB data

| BB - spot | 176Yb/177Hf a | ±2s     | 176Lu/177Hf a | ±2s     | 178Hf/177Hf | ±2s | SigHf b (V) | 176Hf/177Hf | ±2s c   | 176Hf/177Hf(t)d | eHf(t) d | ±2s c   | age     |
|-----------|---------------|---------|---------------|---------|-------------|-----|-------------|-------------|---------|-----------------|----------|---------|---------|
| 1         | 0,006332287   | 5       | 0,000133582   | 1       | 1,466334149 |     | 11          | 0,28167837  | 21      | 0,281676966     | -27      | 1       | 560 ± 1 |
| 2         | 0,006353728   | 6       | 0,000133843   | 1       | 1,466413249 |     | 11          | 0,281668357 | 22      | 0,281666951     | -27      | 1       | 560 ± 1 |
| 3         | 0,00630582    | 5       | 0,000133473   | 1       | 1,466320155 |     | 11          | 0,281665478 | 26      | 0,281664075     | -27      | 1       | 560 ± 1 |
| 5         | 0,006298307   | 5       | 0,0001334     | 1       | 1,466363444 |     | 11          | 0,281671478 | 27      | 0,281670076     | -27      | 1       | 560 ± 1 |
| 45        | 0,006209584   | 5       | 0,000130684   | 1       | 1,466078192 |     | 11          | 0,281663478 | 30      | 0,281662104     | -27      | 1       | 560 ± 1 |
| 46        | 0,005954669   | 6       | 0,000126351   | 1       | 1,465985861 |     | 11          | 0,281657433 | 26      | 0,281656105     | -27      | 1       | 560 ± 1 |
| 47        | 0,006039576   | 5       | 0,000127428   | 1       | 1,46610396  |     | 11          | 0,281658798 | 28      | 0,281657458     | -27      | 1       | 560 ± 1 |
| 72        | 0,005964098   | 5       | 0,000127106   | 1       | 1,46602697  |     | 11          | 0,281672829 | 23      | 0,281671493     | -27      | 1       | 560 ± 1 |
| 73        | 0,005951732   | 6       | 0,000126382   | 1       | 1,466026875 |     | 11          | 0,281677516 | 25      | 0,281676188     | -27      | 1       | 560 ± 1 |
| 74        | 0,006207716   | 5       | 0,000132221   | 1       | 1,466031238 |     | 11          | 0,28165897  | 25      | 0,28165758      | -27      | 1       | 560 ± 1 |
| 117       | 0,006283215   | 5       | 0,000132135   | 1       | 1,466432428 |     | 11          | 0,281691623 | 17      | 0,281690234     | -26      | 1       | 560 ± 1 |
| 118       | 0,006262387   | 5       | 0,00013225    | 1       | 1,466467493 |     | 11          | 0,281660846 | 16      | 0,281659456     | -27      | 1       | 560 ± 1 |
| 119       | 0,006222159   | 5       | 0,000131772   | 1       | 1,466476436 |     | 11          | 0,28167829  | 15      | 0,281676905     | -27      | 1       | 560 ± 1 |
| 166       | 0,006144028   | 5       | 0,000131211   | 1       | 1,466651791 |     | 11          | 0,281667504 | 16      | 0,281666125     | -27      | 1       | 560 ± 1 |
| 167       | 0,006109583   | 5       | 0,000130898   | 1       | 1,466596679 |     | 11          | 0,281695183 | 15      | 0,281693808     | -26      | 1       | 560 ± 1 |
| 168       | 0,006138198   | 6       | 0,000130949   | 1       | 1,466718435 |     | 11          | 0,281651508 | 16      | 0,281650131     | -28      | 1       | 560 ± 1 |
| 215       | 0,005899939   | 5       | 0,000125511   | 1       | 1,466872767 |     | 11          | 0,281668571 | 16      | 0,281667252     | -27      | 1       | 560 ± 1 |
| 216       | 0,006177573   | 5       | 0,000130857   | 1       | 1,466909497 |     | 11          | 0,281679251 | 130     | 0,281677876     | -27      | 1       | 560 ± 1 |
| 4         | 0,006279875   | 5       | 0,000133297   | 1       | 1,466237376 |     | 11          | 0,281647329 | 27      | 0,281645928     | -28      | 1       | 560 ± 1 |
| 118       | 0,006262387   | 5       | 0,00013225    | 1       | 1,466467493 |     | 11          | 0,281652859 | 16      | 0,281651469     | -28      | 1       | 560 ± 1 |
| 217       | 0,006148148   | #DIV/0! | 0,000130616   | #DIV/0! | 1,466811847 |     | 11          | 0,281646723 | #DIV/0! | 0,28164535      | -28      | #DIV/0! | 560 ± 1 |
